# Supplementary material for: High-throughput single-cell DNA sequencing of acute myeloid leukemia tumors with droplet microfluidics
Source: PubMed Central journal article supplement (PMC6120635; doi:10.1101/gr.232272.117), 2018-09
Supplement: supp_gr.232272.117_Supplemental_Fig_S4.pdf [file supp_gr.232272.117_Supplemental_Fig_S4.pdf]

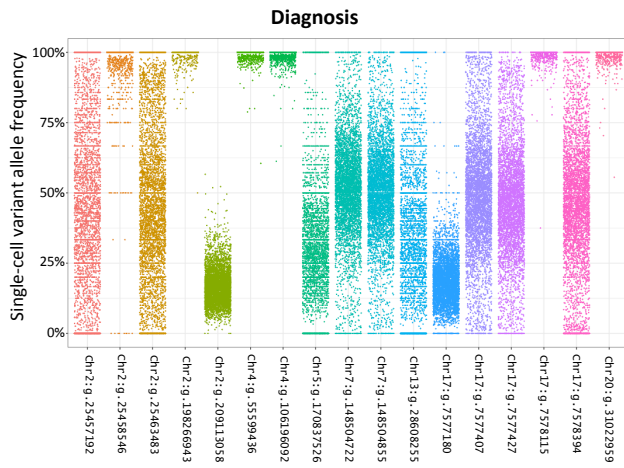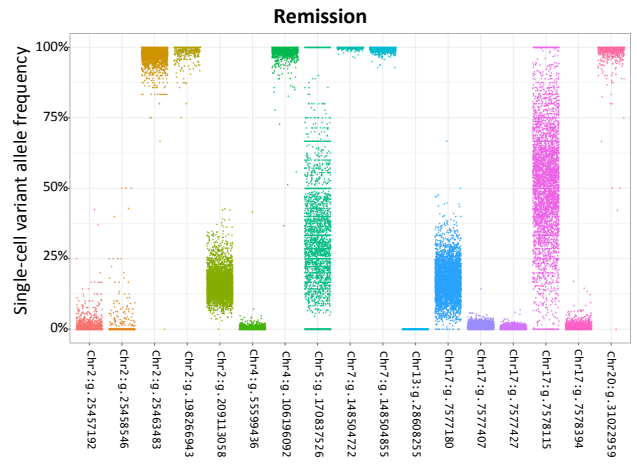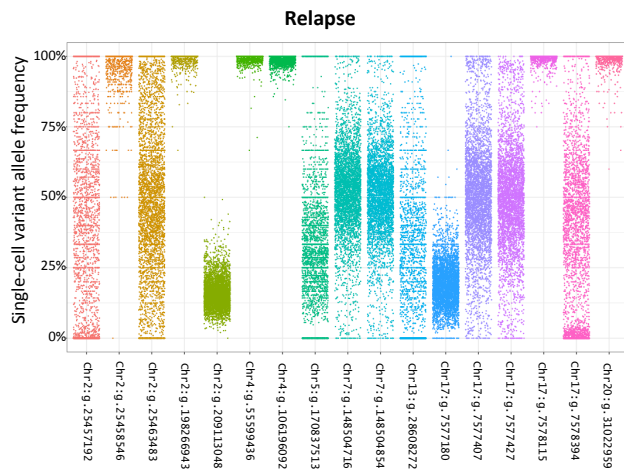

**Supplemental Figure S4.** *Single-cell variant allele frequencies.* Single cell VAFs are plotted for all 17 of the identified genetic variants found in the diagnosis, complete remission and relapse samples.
