# Supplementary material for: High-throughput single-cell DNA sequencing of acute myeloid leukemia tumors with droplet microfluidics
Source: PubMed Central journal article supplement (PMC6120635; doi:10.1101/gr.232272.117), 2018-09
Supplement: supp_gr.232272.117_Supplemental_Table_S2.pdf [file supp_gr.232272.117_Supplemental_Table_S2.pdf]

| Gene          | Transcript   | Strand | Variant coordinates (gDNA/cDNA/protein)                                                                     | Region                        |
|---------------|--------------|--------|-------------------------------------------------------------------------------------------------------------|-------------------------------|
| <i>DNMT3A</i> | NM_022552    | -      | Chr2:g.25457192G>A/c.2695C>T/p.R899C                                                                        | cds_in_exon_23                |
| <i>DNMT3A</i> | NM_022552    | -      | Chr2:g.25458546C>T/c.2597+30G>A/.                                                                           | intron_between_exon_22_and_23 |
| <i>DNMT3A</i> | NM_022552    | -      | Chr2:g.25463483G>A/c.2173+26C>T/.                                                                           | intron_between_exon_18_and_19 |
| <i>SF3B1</i>  | NM_012433    | -      | Chr2:g.198266943C>T/c.2078-89G>A/.                                                                          | intron_between_exon_14_and_15 |
| <i>IDH1</i>   | NM_001282387 | -      | Chr2:g.209113058de1A/c.414+44de1T/.                                                                         | intron_between_exon_4_and_5   |
| <i>KIT</i>    | NM_000222    | +      | Chr4:g.55599436T>C/c.2484+78T>C/.                                                                           | intron_between_exon_17_and_18 |
| <i>TET2</i>   | NM_001127208 | +      | Chr4:g.106196092C>T/c.4538-113C>T/.                                                                         | intron_between_exon_10_and_11 |
| <i>NPM1</i>   | NM_002520    | +      | Chr5:g.170837526de1T/c.847-5de1T/.                                                                          | intron_between_exon_10_and_11 |
| <i>EZH2</i>   | NM_001203247 | -      | Chr7:g.148504722de1G/c.2241+21de1C/.                                                                        | 3-UTR;noncoding_exon_20       |
| <i>EZH2</i>   | NM_001203247 | -      | Chr7:g.148504855_148504859dupGACTT/c.2181-61_2181-57dupAAGTC/.                                              | intron_between_exon_19_and_20 |
| <i>FLT3</i>   | NM_004119    | -      | Chr13:g.28608255_28608275dupGATCATATTCATATTCCTCTGA/c.1784_1804dupGAGAATATGAATATGATCTCA/p.R595_L601dupREYEDL | cds_in_exon_14                |
| <i>TP53</i>   | NM_001126115 | -      | Chr17:g.7577180C>T/c.387-25G>A/.                                                                            | intron_between_exon_3_and_4   |
| <i>TP53</i>   | NM_001126115 | -      | Chr17:g.7577407A>C/c.386+92T>G/.                                                                            | intron_between_exon_3_and_4   |
| <i>TP53</i>   | NM_001126115 | -      | Chr17:g.7577427G>A/c.386+72C>T/.                                                                            | intron_between_exon_3_and_4   |
| <i>TP53</i>   | NM_001126115 | -      | Chr17:g.7578115T>C/c.276+62A>G/.                                                                            | intron_between_exon_2_and_3   |
| <i>TP53</i>   | NM_001126115 | -      | Chr17:g.7578394T>C/c.140A>G/p.H47R                                                                          | cds_in_exon_1                 |
| <i>ASXL1</i>  | NM_015338    | +      | Chr20:g.31022959T>C/c.2444T>C/p.L815P                                                                       | cds_in_exon_12                |

**Supplemental Table S2.** *List of the sequence variants identified from the patient 1 AML diagnosis sample. From this list, four non-synonymous coding region variants were identified in ASXL1, TP53, DNMT3A and FLT3.*
