# Supplementary material for: High-throughput single-cell DNA sequencing of acute myeloid leukemia tumors with droplet microfluidics
Source: HighWire-hosted journal article supplement (doi:10.1101/gr.232272.117), 2018-08-07
Supplement: Supplemental_Table_S3.pdf [file Supplemental_Table_S3.pdf]

| Gene         | Transcript   | Strand | Variant coordinates (gDNA/cDNA/protein)                        | Region                        |
|--------------|--------------|--------|----------------------------------------------------------------|-------------------------------|
| <i>NRAS</i>  | NM_002524    | -      | Chr1:g.115258745C>G/c.37G>C/p.G13R                             | cds_in_exon_2                 |
| <i>SF3B1</i> | NM_012433    | -      | Chr2:g.198266943C>T/c.2078-89G>A/.                             | intron_between_exon_14_and_15 |
| <i>SF3B1</i> | XM_005246428 | -      | Chr2:g.198267246_198267247insG/c.1639+33_1639+34insC/.         | intron_between_exon_15_and_16 |
| <i>IDH1</i>  | XM_005246524 | -      | Chr2:g.209113058delA/c.414+44delT/.                            | intron_between_exon_2_and_3   |
| <i>KIT</i>   | NM_000222    | +      | Chr4:g.55599436T>C/c.2484+78T>C/.                              | intron_between_exon_17_and_18 |
| <i>NPM1</i>  | NM_002520    | +      | Chr5:g.170837457A>G/c.847-74A>G/.                              | intron_between_exon_10_and_11 |
| <i>NPM1</i>  | NM_002520    | +      | Chr5:g.170837526delT/c.847-5delT/.                             | intron_between_exon_10_and_11 |
| <i>EZH2</i>  | NM_001203249 | -      | Chr7:g.148504718G>A/c.2088+20C>T/.                             | 3-UTR;noncoding_exon_19       |
| <i>EZH2</i>  | NM_001203249 | -      | Chr7:g.148504855_148504859dupGACTT/c.2028-61_2028-57dupAAGTC/. | intron_between_exon_18_and_19 |
| <i>JAK2</i>  | NM_004972    | +      | Chr9:g.5073691delT/c.1777-7delT/.                              | intron_between_exon_13_and_14 |
| <i>WT1</i>   | XM_005253120 | -      | Chr11:g.32417945T>C/c.852A>G/p.R284R                           | cds_in_exon_6                 |
| <i>WT1</i>   | XM_005253120 | -      | Chr11:g.32417962A>G/c.844-9T>C/.                               | intron_between_exon_5_and_6   |
| <i>FLT3</i>  | NM_004119    | -      | Chr13:g.28592546T>C/c.2541+58A>G/.                             | intron_between_exon_20_and_21 |
| <i>FLT3</i>  | NM_004119    | -      | Chr13:g.28602256C>T/c.2053+59G>A/.                             | intron_between_exon_16_and_17 |
| <i>IDH2</i>  | XM_005254893 | -      | Chr15:g.90631934C>T/c.263G>A/p.R140Q                           | cds_in_exon_4                 |
| <i>TP53</i>  | NM_001126115 | -      | Chr17:g.7577180C>T/c.387-25G>A/.                               | intron_between_exon_3_and_4   |
| <i>TP53</i>  | NM_001126115 | -      | Chr17:g.7578115T>C/c.276+62A>G/.                               | intron_between_exon_2_and_3   |
| <i>SRSF2</i> | NM_001195427 | -      | Chr17:g.74732959G>T/c.284C>A/p.P95H                            | cds_in_exon_1                 |
| <i>ASXL1</i> | NM_015338    | +      | Chr20:g.31022449dupG/c.1934dupG/p.G646Wfs*12                   | cds_in_exon_13                |
| <i>ASXL1</i> | NM_015338    | +      | Chr20:g.31022959T>C/c.2444T>C/p.L815P                          | cds_in_exon_13                |

**Supplemental Table S3.** *List of the sequence variants identified from the patient 2 AML diagnosis sample.* From this list, five non-synonymous coding region variants were identified in *ASXL1*, *IDH2*, *NRAS* and *SRSF2*. These variants were identified with a targeted single-cell sequencing panel that was slightly modified from the panel shown in Table S1 with amplicons covering *CBL*, *MIR142*, *TET2*, *PHF6*, *RAD21* and *STAG2* removed. The *SRSF2* mutation was not considered for further analysis due to the majority of cells identified not having any sequence coverage at this position.
